# Supplementary material for: Mediating Effects of Specific Types of Coping Styles on the Relationship between Childhood Maltreatment and Depressive Symptoms among Chinese Undergraduates: The Role of Sex
Source: PubMed Central journal article supplement (PMC7246430; doi:10.3390/ijerph17093120), 2020-04-30
Supplement: ijerph-17-03120-s001.pdf [file ijerph-17-03120-s001.pdf]

Supplementary Materials.

**Table S1.** A Mediating role of different types of coping styles in the association between emotional abuse and depressive symptoms.

| Mediator          | Model | a         | b         | Direct Effect<br>c' | Boot CI |       | Indirect Effect<br>(a × b) | Boot CI |       | Mediation Ratio, %<br>a × b/(a × b + c' ) |
|-------------------|-------|-----------|-----------|---------------------|---------|-------|----------------------------|---------|-------|-------------------------------------------|
|                   |       |           |           |                     | LLCI    | ULCI  |                            | LLCI    | ULCI  |                                           |
| <b>Total</b>      |       |           |           |                     |         |       |                            |         |       |                                           |
| Problem solving   | 1     | -0.238 ** | -0.959 ** | 0.767 **            | 0.699   | 0.835 | 0.228                      | 0.198   | 0.261 | 13.4                                      |
|                   | 2     | -0.231 ** | -0.978 ** | 0.772 **            | 0.703   | 0.840 | 0.226                      | 0.196   | 0.259 | 13.4                                      |
| Self-blame        | 1     | 0.389 **  | 1.312 **  | 0.767 **            | 0.699   | 0.835 | 0.511                      | 0.462   | 0.565 | 30.0                                      |
|                   | 2     | 0.384 **  | 1.282 **  | 0.772 **            | 0.703   | 0.840 | 0.493                      | 0.444   | 0.546 | 29.2                                      |
| Help seeking      | 1     | -0.230 ** | -0.539 ** | 0.767 **            | 0.699   | 0.835 | 0.124                      | 0.103   | 0.147 | 7.3                                       |
|                   | 2     | -0.230 ** | -0.518 ** | 0.772 **            | 0.703   | 0.840 | 0.119                      | 0.098   | 0.142 | 7.1                                       |
| Fantasy           | 1     | 0.253 **  | -0.053    | 0.767 **            | 0.699   | 0.835 | -0.013                     | -0.039  | 0.013 | -                                         |
|                   | 2     | 0.249 **  | -0.007    | 0.772 **            | 0.703   | 0.840 | -0.002                     | -0.027  | 0.024 | -                                         |
| Problem avoidance | 1     | 0.288 **  | 0.147 *   | 0.767 **            | 0.699   | 0.835 | 0.043                      | 0.013   | 0.072 | 2.5                                       |
|                   | 2     | 0.283 **  | 0.139 *   | 0.772 **            | 0.703   | 0.840 | 0.039                      | 0.011   | 0.068 | 2.3                                       |
| Rationalization   | 1     | 0.196 **  | 0.222 **  | 0.767 **            | 0.699   | 0.835 | 0.044                      | 0.022   | 0.067 | 2.6                                       |
|                   | 2     | 0.197 **  | 0.203 **  | 0.772 **            | 0.703   | 0.840 | 0.040                      | 0.018   | 0.064 | 2.4                                       |
| <b>Males</b>      |       |           |           |                     |         |       |                            |         |       |                                           |
| Problem solving   | 1     | -0.222 ** | -1.203 ** | 0.798 **            | 0.652   | 0.943 | 0.267                      | 0.199   | 0.350 | 15.5                                      |
|                   | 3     | -0.220 ** | -1.202 ** | 0.786 **            | 0.640   | 0.932 | 0.264                      | 0.195   | 0.348 | 15.6                                      |
| Self-blame        | 1     | 0.370 **  | 1.457 **  | 0.798 **            | 0.652   | 0.943 | 0.540                      | 0.433   | 0.659 | 31.4                                      |
|                   | 3     | 0.360 **  | 1.418 **  | 0.786 **            | 0.640   | 0.932 | 0.511                      | 0.408   | 0.625 | 30.2                                      |
| Help seeking      | 1     | -0.227 ** | -0.409 ** | 0.798 **            | 0.652   | 0.943 | 0.093                      | 0.056   | 0.138 | 5.4                                       |
|                   | 3     | -0.226 ** | -0.425 ** | 0.786 **            | 0.640   | 0.932 | 0.096                      | 0.060   | 0.142 | 5.7                                       |

|                   |   |           |           |          |       |       |        |        |       |      |
|-------------------|---|-----------|-----------|----------|-------|-------|--------|--------|-------|------|
| Fantasy           | 1 | 0.265 **  | -0.089    | 0.798 ** | 0.652 | 0.943 | -0.023 | -0.084 | 0.037 | -    |
|                   | 3 | 0.259 **  | -0.062    | 0.786 ** | 0.640 | 0.932 | -0.016 | -0.074 | 0.043 | -    |
| Problem avoidance | 1 | 0.278 **  | 0.047     | 0.798 ** | 0.652 | 0.943 | 0.013  | -0.050 | 0.075 | -    |
|                   | 3 | 0.268 **  | 0.062     | 0.786 ** | 0.640 | 0.932 | 0.017  | -0.042 | 0.076 | -    |
| Rationalization   | 1 | 0.182 **  | 0.180     | 0.798 ** | 0.652 | 0.943 | 0.033  | -0.009 | 0.078 | -    |
|                   | 3 | 0.173 **  | 0.181     | 0.786 ** | 0.640 | 0.932 | 0.031  | -0.008 | 0.074 | -    |
| <b>Females</b>    |   |           |           |          |       |       |        |        |       |      |
| Problem solving   | 1 | -0.241 ** | -0.894 ** | 0.772 ** | 0.695 | 0.849 | 0.215  | 0.182  | 0.253 | 12.6 |
|                   | 3 | -0.235 ** | -0.901 ** | 0.765 ** | 0.688 | 0.842 | 0.212  | 0.179  | 0.249 | 12.5 |
| Self-blame        | 1 | 0.400 **  | 1.265 **  | 0.772 ** | 0.695 | 0.849 | 0.505  | 0.453  | 0.563 | 29.5 |
|                   | 3 | 0.393 **  | 1.245 **  | 0.765 ** | 0.688 | 0.842 | 0.490  | 0.438  | 0.546 | 29.0 |
| Help seeking      | 1 | -0.237 ** | -0.555 ** | 0.772 ** | 0.695 | 0.849 | 0.131  | 0.106  | 0.159 | 7.7  |
|                   | 3 | -0.232 ** | -0.549 ** | 0.765 ** | 0.688 | 0.842 | 0.128  | 0.103  | 0.154 | 7.6  |
| Fantasy           | 1 | 0.250 **  | -0.019    | 0.772 ** | 0.695 | 0.849 | -0.005 | -0.034 | 0.023 | -    |
|                   | 3 | 0.246 **  | 0.010     | 0.765 ** | 0.688 | 0.842 | 0.003  | -0.027 | 0.030 | -    |
| Problem avoidance | 1 | 0.295 **  | 0.172 *   | 0.772 ** | 0.695 | 0.849 | 0.051  | 0.017  | 0.086 | 3.0  |
|                   | 3 | 0.289 **  | 0.165 *   | 0.765 ** | 0.688 | 0.842 | 0.048  | 0.015  | 0.081 | 2.8  |
| Rationalization   | 1 | 0.205 **  | 0.221 **  | 0.772 ** | 0.695 | 0.849 | 0.045  | 0.020  | 0.074 | 2.6  |
|                   | 3 | 0.206 **  | 0.220 **  | 0.765 ** | 0.688 | 0.842 | 0.045  | 0.019  | 0.074 | 2.7  |

\*  $p < 0.05$ , \*\*  $p < 0.001$ . a: Effect of CM on mediators, b: Effect of mediators on depressive symptoms. Model 1: Single factor analysis, Model 2: Adjusted for age, gender, urban/rural, school, only child status, parents' education level, economic status of family, Model 3: Adjusted for age, urban/rural, school, only child status, parents' education level, economic status of family.

**Table S2.** A Mediating role of different types of coping styles in the association between physical abuse and depressive symptoms.

| Mediator          | Model | a         | b         | Direct Effect | Boot CI |       | Indirect Effect | Boot CI |       | Mediation Ratio, %               |
|-------------------|-------|-----------|-----------|---------------|---------|-------|-----------------|---------|-------|----------------------------------|
|                   |       |           |           | c'            | LLCI    | ULCI  | (a × b)         | LLCI    | ULCI  | $a \times b / (a \times b + c')$ |
| <b>Total</b>      |       |           |           |               |         |       |                 |         |       |                                  |
| Problem solving   | 1     | -0.212 ** | -1.020 ** | 0.680 **      | 0.569   | 0.790 | 0.217           | 0.168   | 0.269 | 13.6                             |
|                   | 2     | -0.213 ** | -1.033 ** | 0.658 **      | 0.547   | 0.768 | 0.220           | 0.171   | 0.273 | 14.4                             |
| Self-blame        | 1     | 0.343 **  | 1.415 **  | 0.680 **      | 0.569   | 0.790 | 0.486           | 0.408   | 0.574 | 30.5                             |
|                   | 2     | 0.326 **  | 1.387 **  | 0.658 **      | 0.547   | 0.768 | 0.452           | 0.376   | 0.536 | 29.6                             |
| Help seeking      | 1     | -0.208 ** | -0.596 ** | 0.680 **      | 0.569   | 0.790 | 0.124           | 0.097   | 0.155 | 7.8                              |
|                   | 2     | -0.195 ** | -0.584 ** | 0.658 **      | 0.547   | 0.768 | 0.114           | 0.088   | 0.144 | 7.5                              |
| Fantasy           | 1     | 0.224 **  | -0.009    | 0.680 **      | 0.569   | 0.790 | -0.002          | -0.025  | 0.023 | -                                |
|                   | 2     | 0.215 **  | 0.031     | 0.658 **      | 0.547   | 0.768 | 0.007           | -0.016  | 0.030 | -                                |
| Problem avoidance | 1     | 0.268 **  | 0.150 *   | 0.680 **      | 0.569   | 0.790 | 0.040           | 0.013   | 0.071 | 2.5                              |
|                   | 2     | 0.248 **  | 0.143 *   | 0.658 **      | 0.547   | 0.768 | 0.036           | 0.011   | 0.064 | 2.3                              |
| Rationalization   | 1     | 0.195 **  | 0.239 **  | 0.680 **      | 0.569   | 0.790 | 0.047           | 0.024   | 0.074 | 2.9                              |
|                   | 2     | 0.180 **  | 0.230 **  | 0.658 **      | 0.547   | 0.768 | 0.041           | 0.021   | 0.067 | 2.7                              |
| <b>Males</b>      |       |           |           |               |         |       |                 |         |       |                                  |
| Problem solving   | 1     | -0.179 ** | -1.272 ** | 0.409 **      | 0.222   | 0.596 | 0.228           | 0.133   | 0.342 | 19.8                             |
|                   | 3     | -0.175 ** | -1.269 ** | 0.398 **      | 0.211   | 0.585 | 0.222           | 0.127   | 0.337 | 20.0                             |
| Self-blame        | 1     | 0.255 **  | 1.569 **  | 0.409 **      | 0.222   | 0.596 | 0.401           | 0.269   | 0.554 | 34.7                             |
|                   | 3     | 0.241 **  | 1.527 **  | 0.398 **      | 0.211   | 0.585 | 0.367           | 0.244   | 0.514 | 33.1                             |
| Help seeking      | 1     | -0.197 ** | -0.469 ** | 0.409 **      | 0.222   | 0.596 | 0.092           | 0.055   | 0.144 | 8.0                              |
|                   | 3     | -0.195 ** | -0.486 ** | 0.398 **      | 0.211   | 0.585 | 0.095           | 0.057   | 0.147 | 8.5                              |
| Fantasy           | 1     | 0.202 **  | -0.027    | 0.409 **      | 0.222   | 0.596 | -0.005          | -0.054  | 0.041 | -                                |
|                   | 3     | 0.190 **  | 0.002     | 0.398 **      | 0.211   | 0.585 | 0.000           | -0.045  | 0.046 | -                                |
| Problem avoidance | 1     | 0.227 **  | 0.025     | 0.409 **      | 0.222   | 0.596 | 0.006           | -0.046  | 0.058 | -                                |

|                   |   |           |           |          |       |       |       |        |       |      |
|-------------------|---|-----------|-----------|----------|-------|-------|-------|--------|-------|------|
|                   | 3 | 0.212 **  | 0.040     | 0.398 ** | 0.211 | 0.585 | 0.009 | -0.039 | 0.058 | -    |
| Rationalization   | 1 | 0.131 **  | 0.173     | 0.409 ** | 0.222 | 0.596 | 0.023 | -0.006 | 0.064 | -    |
|                   | 3 | 0.118 **  | 0.170     | 0.398 ** | 0.211 | 0.585 | 0.020 | -0.005 | 0.059 | -    |
| <b>Females</b>    |   |           |           |          |       |       |       |        |       |      |
| Problem solving   | 1 | -0.248 ** | -0.940 ** | 0.841 ** | 0.701 | 0.980 | 0.233 | 0.175  | 0.296 | 12.5 |
|                   | 3 | -0.240 ** | -0.945 ** | 0.829 ** | 0.689 | 0.969 | 0.227 | 0.169  | 0.289 | 12.5 |
| Self-blame        | 1 | 0.396 **  | 1.365 **  | 0.841 ** | 0.701 | 0.980 | 0.541 | 0.447  | 0.644 | 29.1 |
|                   | 3 | 0.384 **  | 1.342 **  | 0.829 ** | 0.689 | 0.969 | 0.516 | 0.425  | 0.618 | 28.5 |
| Help seeking      | 1 | -0.202 ** | -0.629 ** | 0.841 ** | 0.701 | 0.980 | 0.127 | 0.093  | 0.168 | 6.8  |
|                   | 3 | -0.196 ** | -0.621 ** | 0.829 ** | 0.689 | 0.969 | 0.122 | 0.089  | 0.162 | 6.7  |
| Fantasy           | 1 | 0.242 **  | 0.017     | 0.841 ** | 0.701 | 0.980 | 0.004 | -0.024 | 0.033 | -    |
|                   | 3 | 0.231 **  | 0.045     | 0.829 ** | 0.689 | 0.969 | 0.010 | -0.017 | 0.038 | -    |
| Problem avoidance | 1 | 0.288 **  | 0.190 *   | 0.841 ** | 0.701 | 0.980 | 0.055 | 0.022  | 0.094 | 2.9  |
|                   | 3 | 0.274 **  | 0.181 *   | 0.829 ** | 0.689 | 0.969 | 0.049 | 0.018  | 0.086 | 2.7  |
| Rationalization   | 1 | 0.225 **  | 0.254 **  | 0.841 ** | 0.701 | 0.980 | 0.057 | 0.028  | 0.092 | 3.1  |
|                   | 3 | 0.222 **  | 0.256 **  | 0.829 ** | 0.689 | 0.969 | 0.057 | 0.028  | 0.091 | 3.1  |

\*  $p < 0.05$ , \*\*  $p < 0.001$ . a: Effect of CM on mediators, b: Effect of mediators on depressive symptoms. Model 1: Single factor analysis, Model 2: Adjusted for age, gender, urban/rural, school, only child status, parents' education level, economic status of family, Model 3: Adjusted for age, urban/rural, school, only child status, parents' education level, economic status of family.

**Table S3.** A Mediating role of different types of coping styles in the association between sexual abuse and depressive symptoms.

| Mediator          | Model | a         | b         | Direct Effect | Boot CI |       | Indirect Effect | Boot CI |       | Mediation Ratio, %               |
|-------------------|-------|-----------|-----------|---------------|---------|-------|-----------------|---------|-------|----------------------------------|
|                   |       |           |           | c'            | LLCI    | ULCI  | (a × b)         | LLCI    | ULCI  | $a \times b / (a \times b + c')$ |
| <b>Total</b>      |       |           |           |               |         |       |                 |         |       |                                  |
| Problem solving   | 1     | -0.265 ** | -1.023 ** | 1.108 **      | 0.934   | 1.283 | 0.271           | 0.199   | 0.347 | 12.0                             |
|                   | 2     | -0.276 ** | -1.034 ** | 1.082 **      | 0.907   | 1.256 | 0.286           | 0.213   | 0.364 | 13.0                             |
| Self-blame        | 1     | 0.434 **  | 1.422 **  | 1.108 **      | 0.934   | 1.283 | 0.618           | 0.479   | 0.777 | 27.4                             |
|                   | 2     | 0.422 **  | 1.393 **  | 1.082 **      | 0.907   | 1.256 | 0.588           | 0.451   | 0.740 | 26.7                             |
| Help seeking      | 1     | -0.237 ** | -0.606 ** | 1.108 **      | 0.934   | 1.283 | 0.144           | 0.103   | 0.192 | 6.4                              |
|                   | 2     | -0.220 ** | -0.594 ** | 1.082 **      | 0.907   | 1.256 | 0.131           | 0.092   | 0.178 | 5.9                              |
| Fantasy           | 1     | 0.292 **  | -0.008    | 1.108 **      | 0.934   | 1.283 | -0.002          | -0.032  | 0.030 | -                                |
|                   | 2     | 0.293 **  | 0.030     | 1.082 **      | 0.907   | 1.256 | 0.009           | -0.021  | 0.042 | -                                |
| Problem avoidance | 1     | 0.349 **  | 0.149 *   | 1.108 **      | 0.934   | 1.283 | 0.052           | 0.017   | 0.095 | 2.3                              |
|                   | 2     | 0.336 **  | 0.140 *   | 1.082 **      | 0.907   | 1.256 | 0.047           | 0.014   | 0.089 | 2.1                              |
| Rationalization   | 1     | 0.256 **  | 0.242 **  | 1.108 **      | 0.934   | 1.283 | 0.062           | 0.032   | 0.102 | 2.7                              |
|                   | 2     | 0.240 **  | 0.234 **  | 1.082 **      | 0.907   | 1.256 | 0.056           | 0.028   | 0.095 | 2.6                              |
| <b>Males</b>      |       |           |           |               |         |       |                 |         |       |                                  |
| Problem solving   | 1     | -0.192 ** | -1.257 ** | 0.829 **      | 0.550   | 1.108 | 0.242           | 0.119   | 0.392 | 14.4                             |
|                   | 3     | -0.197 ** | -1.254 ** | 0.800 **      | 0.521   | 1.079 | 0.247           | 0.122   | 0.394 | 14.8                             |
| Self-blame        | 1     | 0.329 **  | 1.562 **  | 0.829 **      | 0.550   | 1.108 | 0.514           | 0.308   | 0.790 | 30.6                             |
|                   | 3     | 0.332 **  | 1.521 **  | 0.800 **      | 0.521   | 1.079 | 0.505           | 0.313   | 0.766 | 30.3                             |
| Help seeking      | 1     | -0.117 ** | -0.499 ** | 0.829 **      | 0.550   | 1.108 | 0.058           | 0.021   | 0.112 | 3.5                              |
|                   | 3     | -0.125 ** | -0.514 ** | 0.800 **      | 0.521   | 1.079 | 0.064           | 0.024   | 0.120 | 3.9                              |
| Fantasy           | 1     | 0.267 **  | -0.030    | 0.829 **      | 0.550   | 1.108 | -0.008          | -0.073  | 0.055 | -                                |

|                   |   |           |           |          |       |       |        |        |       |      |
|-------------------|---|-----------|-----------|----------|-------|-------|--------|--------|-------|------|
|                   | 3 | 0.275 **  | -0.002    | 0.800 ** | 0.521 | 1.079 | -0.001 | -0.067 | 0.065 | -    |
| Problem avoidance | 1 | 0.271 **  | 0.042     | 0.829 ** | 0.550 | 1.108 | 0.011  | -0.050 | 0.078 | -    |
|                   | 3 | 0.280 **  | 0.054     | 0.800 ** | 0.521 | 1.079 | 0.015  | -0.046 | 0.085 | -    |
| Rationalization   | 1 | 0.217 **  | 0.150     | 0.829 ** | 0.550 | 1.108 | 0.033  | -0.014 | 0.105 | -    |
|                   | 3 | 0.221 **  | 0.146     | 0.800 ** | 0.521 | 1.079 | 0.032  | -0.015 | 0.106 | -    |
| <b>Females</b>    |   |           |           |          |       |       |        |        |       |      |
| Problem solving   | 1 | -0.348 ** | -0.948 ** | 1.289 ** | 1.059 | 1.519 | 0.330  | 0.242  | 0.434 | 12.4 |
|                   | 3 | -0.341 ** | -0.954 ** | 1.300 ** | 1.070 | 1.528 | 0.325  | 0.237  | 0.428 | 12.3 |
| Self-blame        | 1 | 0.507 **  | 1.382 **  | 1.289 ** | 1.059 | 1.519 | 0.701  | 0.516  | 0.914 | 26.3 |
|                   | 3 | 0.499 **  | 1.358 **  | 1.300 ** | 1.070 | 1.528 | 0.677  | 0.501  | 0.887 | 25.6 |
| Help seeking      | 1 | -0.308 ** | -0.626 ** | 1.289 ** | 1.059 | 1.519 | 0.193  | 0.132  | 0.268 | 7.2  |
|                   | 3 | -0.302 ** | -0.618 ** | 1.300 ** | 1.070 | 1.528 | 0.187  | 0.128  | 0.259 | 7.1  |
| Fantasy           | 1 | 0.317 **  | 0.017     | 1.289 ** | 1.059 | 1.519 | 0.005  | -0.033 | 0.044 | -    |
|                   | 3 | 0.309 **  | 0.044     | 1.300 ** | 1.070 | 1.528 | 0.014  | -0.024 | 0.052 | -    |
| Problem avoidance | 1 | 0.396 **  | 0.179 *   | 1.289 ** | 1.059 | 1.519 | 0.071  | 0.026  | 0.129 | 2.7  |
|                   | 3 | 0.389 **  | 0.168 *   | 1.300 ** | 1.070 | 1.528 | 0.065  | 0.021  | 0.121 | 2.5  |
| Rationalization   | 1 | 0.262 **  | 0.276 **  | 1.289 ** | 1.059 | 1.519 | 0.072  | 0.036  | 0.120 | 2.7  |
|                   | 3 | 0.260 **  | 0.279 **  | 1.300 ** | 1.070 | 1.528 | 0.073  | 0.036  | 0.120 | 2.7  |

\*  $p < 0.05$ , \*\*  $p < 0.001$ . a: Effect of CM on mediators, b: Effect of mediators on depressive symptoms. Model 1: Single factor analysis, Model 2: Adjusted for age, gender, urban/rural, school, only child status, parents' education level, economic status of family, Model 3: Adjusted for age, urban/rural, school, only child status, parents' education level, economic status of family.

**Table S4.** A Mediating role of different types of coping styles in the association between emotional neglect and depressive symptoms.

| Mediator          | Model | a         | b         | Direct Effect | Boot CI |       | Indirect Effect | Boot CI |       | Mediation Ratio, %  |
|-------------------|-------|-----------|-----------|---------------|---------|-------|-----------------|---------|-------|---------------------|
|                   |       |           |           | c'            | LLCI    | ULCI  | (a × b)         | LLCI    | ULCI  | a × b/(a × b + c' ) |
| <b>Total</b>      |       |           |           |               |         |       |                 |         |       |                     |
| Problem solving   | 1     | -0.117 ** | -0.965 ** | 0.273 **      | 0.239   | 0.306 | 0.113           | 0.098   | 0.129 | 17.9                |
|                   | 2     | -0.119 ** | -0.978 ** | 0.263 **      | 0.230   | 0.296 | 0.116           | 0.102   | 0.133 | 18.9                |
| Self-blame        | 1     | 0.115 **  | 1.402 **  | 0.273 **      | 0.239   | 0.306 | 0.162           | 0.141   | 0.185 | 25.6                |
|                   | 2     | 0.112 **  | 1.379 **  | 0.263 **      | 0.230   | 0.296 | 0.154           | 0.133   | 0.176 | 25.0                |
| Help seeking      | 1     | -0.107 ** | -0.555 ** | 0.273 **      | 0.239   | 0.306 | 0.059           | 0.049   | 0.070 | 9.4                 |
|                   | 2     | -0.104 ** | -0.546 ** | 0.263 **      | 0.230   | 0.296 | 0.057           | 0.047   | 0.068 | 9.2                 |
| Fantasy           | 1     | 0.051 **  | 0.046     | 0.273 **      | 0.239   | 0.306 | 0.002           | -0.003  | 0.008 | -                   |
|                   | 2     | 0.053 **  | 0.077     | 0.263 **      | 0.230   | 0.296 | 0.004           | -0.001  | 0.010 | -                   |
| Problem avoidance | 1     | 0.090 **  | 0.129 *   | 0.273 **      | 0.239   | 0.306 | 0.012           | 0.003   | 0.021 | 1.8                 |
|                   | 2     | 0.089 **  | 0.120 *   | 0.263 **      | 0.230   | 0.296 | 0.011           | 0.002   | 0.020 | 1.7                 |
| Rationalization   | 1     | 0.059 **  | 0.208 **  | 0.273 **      | 0.239   | 0.306 | 0.012           | 0.006   | 0.020 | 1.9                 |
|                   | 2     | 0.057 **  | 0.201 **  | 0.263 **      | 0.230   | 0.296 | 0.012           | 0.005   | 0.019 | 1.9                 |
| <b>Males</b>      |       |           |           |               |         |       |                 |         |       |                     |
| Problem solving   | 1     | -0.112 ** | -1.205 ** | 0.223 **      | 0.157   | 0.289 | 0.135           | 0.103   | 0.174 | 23.9                |
|                   | 3     | -0.112 ** | -1.204 ** | 0.214 **      | 0.149   | 0.280 | 0.134           | 0.102   | 0.173 | 24.4                |
| Self-blame        | 1     | 0.102 **  | 1.563 **  | 0.223 **      | 0.157   | 0.289 | 0.160           | 0.115   | 0.210 | 28.2                |
|                   | 3     | 0.099 **  | 1.525 **  | 0.214 **      | 0.149   | 0.280 | 0.151           | 0.108   | 0.200 | 27.4                |
| Help seeking      | 1     | -0.087 ** | -0.460 ** | 0.223 **      | 0.157   | 0.289 | 0.040           | 0.025   | 0.059 | 7.1                 |
|                   | 3     | -0.087 ** | -0.476 ** | 0.214 **      | 0.149   | 0.280 | 0.041           | 0.026   | 0.060 | 7.5                 |
| Fantasy           | 1     | 0.072 **  | -0.025    | 0.223 **      | 0.157   | 0.289 | -0.002          | -0.019  | 0.015 | -                   |
|                   | 3     | 0.072 **  | 0.001     | 0.214 **      | 0.149   | 0.280 | 0.000           | -0.016  | 0.017 | -                   |
| Problem avoidance | 1     | 0.089 **  | 0.020     | 0.223 **      | 0.157   | 0.289 | 0.002           | -0.019  | 0.022 | -                   |

|                   |   |           |           |          |       |       |       |        |       |      |
|-------------------|---|-----------|-----------|----------|-------|-------|-------|--------|-------|------|
|                   | 3 | 0.088 **  | 0.033     | 0.214 ** | 0.149 | 0.280 | 0.003 | -0.017 | 0.023 | -    |
| Rationalization   | 1 | 0.051 **  | 0.153     | 0.223 ** | 0.157 | 0.289 | 0.008 | -0.004 | 0.022 | -    |
|                   | 3 | 0.050 **  | 0.149     | 0.214 ** | 0.149 | 0.280 | 0.008 | -0.004 | 0.022 | -    |
| <b>Females</b>    |   |           |           |          |       |       |       |        |       |      |
| Problem solving   | 1 | -0.123 ** | -0.891 ** | 0.288 ** | 0.250 | 0.327 | 0.109 | 0.092  | 0.128 | 16.7 |
|                   | 3 | -0.123 ** | -0.896 ** | 0.284 ** | 0.245 | 0.322 | 0.110 | 0.093  | 0.129 | 17.0 |
| Self-blame        | 1 | 0.120 **  | 1.355 **  | 0.288 ** | 0.250 | 0.327 | 0.162 | 0.138  | 0.189 | 24.7 |
|                   | 3 | 0.117 **  | 1.339 **  | 0.284 ** | 0.245 | 0.322 | 0.156 | 0.132  | 0.182 | 24.2 |
| Help seeking      | 1 | -0.113 ** | -0.572 ** | 0.288 ** | 0.250 | 0.327 | 0.064 | 0.052  | 0.078 | 9.8  |
|                   | 3 | -0.111 ** | -0.568 ** | 0.284 ** | 0.245 | 0.322 | 0.063 | 0.051  | 0.076 | 9.7  |
| Fantasy           | 1 | 0.043 **  | 0.090     | 0.288 ** | 0.250 | 0.327 | 0.004 | -0.001 | 0.010 | -    |
|                   | 3 | 0.045 **  | 0.108     | 0.284 ** | 0.245 | 0.322 | 0.005 | -0.000 | 0.011 | -    |
| Problem avoidance | 1 | 0.089 **  | 0.162 *   | 0.288 ** | 0.250 | 0.327 | 0.014 | 0.005  | 0.026 | 2.2  |
|                   | 3 | 0.089 **  | 0.150 *   | 0.284 ** | 0.245 | 0.322 | 0.013 | 0.004  | 0.025 | 2.1  |
| Rationalization   | 1 | 0.059 **  | 0.224 **  | 0.288 ** | 0.250 | 0.327 | 0.013 | 0.006  | 0.022 | 2.0  |
|                   | 3 | 0.060 **  | 0.229 **  | 0.284 ** | 0.245 | 0.322 | 0.014 | 0.006  | 0.023 | 2.1  |

\*  $p < 0.05$ , \*\*  $p < 0.001$ . a: Effect of CM on mediators, b: Effect of mediators on depressive symptoms. Model 1: Single factor analysis, Model 2: Adjusted for age, gender, urban/rural, school, only child status, parents' education level, economic status of family, Model 3: Adjusted for age, urban/rural, school, only child status, parents' education level, economic status of family.



**Table S5.** A Mediating role of different types of coping styles in the association between physical neglect and depressive symptoms.

| Mediator          | Model | a         | b         | Direct Effect | Boot CI |       | Indirect Effect | Boot CI |       | Mediation Ratio,%                |
|-------------------|-------|-----------|-----------|---------------|---------|-------|-----------------|---------|-------|----------------------------------|
|                   |       |           |           | c'            | LLCI    | ULCI  | (a × b)         | LLCI    | ULCI  | $a \times b / (a \times b + c')$ |
| <b>Total</b>      |       |           |           |               |         |       |                 |         |       |                                  |
| Problem solving   | 1     | -0.167 ** | -0.982 ** | 0.488 **      | 0.431   | 0.545 | 0.164           | 0.140   | 0.191 | 15.7                             |
|                   | 2     | -0.175 ** | -0.991 ** | 0.471 **      | 0.414   | 0.529 | 0.174           | 0.149   | 0.201 | 16.9                             |
| Self-blame        | 1     | 0.188 **  | 1.397 **  | 0.488 **      | 0.431   | 0.545 | 0.263           | 0.228   | 0.300 | 25.0                             |
|                   | 2     | 0.184 **  | 1.376 **  | 0.471 **      | 0.414   | 0.529 | 0.253           | 0.219   | 0.290 | 24.6                             |
| Help seeking      | 1     | -0.161 ** | -0.562 ** | 0.488 **      | 0.431   | 0.545 | 0.090           | 0.074   | 0.108 | 8.6                              |
|                   | 2     | -0.154 ** | -0.556 ** | 0.471 **      | 0.414   | 0.529 | 0.086           | 0.070   | 0.103 | 8.3                              |
| Fantasy           | 1     | 0.078 **  | 0.059     | 0.488 **      | 0.431   | 0.545 | 0.005           | -0.003  | 0.014 | -                                |
|                   | 2     | 0.085 **  | 0.085     | 0.471 **      | 0.414   | 0.529 | 0.007           | -0.001  | 0.017 | -                                |
| Problem avoidance | 1     | 0.150 **  | 0.121 *   | 0.488 **      | 0.431   | 0.545 | 0.018           | 0.003   | 0.034 | 1.7                              |
|                   | 2     | 0.151 **  | 0.113 *   | 0.471 **      | 0.414   | 0.529 | 0.017           | 0.002   | 0.033 | 1.6                              |
| Rationalization   | 1     | 0.102 **  | 0.206 **  | 0.488 **      | 0.431   | 0.545 | 0.021           | 0.009   | 0.034 | 2.0                              |
|                   | 2     | 0.099 **  | 0.202 **  | 0.471 **      | 0.414   | 0.529 | 0.020           | 0.009   | 0.033 | 2.0                              |
| <b>Males</b>      |       |           |           |               |         |       |                 |         |       |                                  |
| Problem solving   | 1     | -0.148 ** | -1.217 ** | 0.459 **      | 0.349   | 0.570 | 0.180           | 0.129   | 0.237 | 18.1                             |
|                   | 3     | -0.150 ** | -1.215 ** | 0.440 **      | 0.328   | 0.551 | 0.182           | 0.133   | 0.240 | 18.6                             |
| Self-blame        | 1     | 0.184 **  | 1.544 **  | 0.459 **      | 0.349   | 0.570 | 0.283           | 0.213   | 0.367 | 28.5                             |
|                   | 3     | 0.183 **  | 1.510 **  | 0.440 **      | 0.328   | 0.551 | 0.277           | 0.206   | 0.359 | 28.3                             |
| Help seeking      | 1     | -0.123 ** | -0.462 ** | 0.459 **      | 0.349   | 0.570 | 0.057           | 0.034   | 0.086 | 5.7                              |
|                   | 3     | -0.127 ** | -0.477 ** | 0.440 **      | 0.328   | 0.551 | 0.060           | 0.037   | 0.090 | 6.2                              |
| Fantasy           | 1     | 0.117 **  | 0.014     | 0.459 **      | 0.349   | 0.570 | 0.002           | -0.025  | 0.029 | -                                |

|                   |   |           |           |          |       |       |        |        |       |      |
|-------------------|---|-----------|-----------|----------|-------|-------|--------|--------|-------|------|
|                   | 3 | 0.122 **  | 0.036     | 0.440 ** | 0.328 | 0.551 | 0.004  | -0.023 | 0.033 | -    |
| Problem avoidance | 1 | 0.168 **  | -0.011    | 0.459 ** | 0.349 | 0.570 | -0.002 | -0.041 | 0.035 | -    |
|                   | 3 | 0.176 **  | -0.000    | 0.440 ** | 0.328 | 0.551 | 0.000  | -0.039 | 0.038 | -    |
| Rationalization   | 1 | 0.106 **  | 0.144     | 0.459 ** | 0.349 | 0.570 | 0.015  | -0.009 | 0.042 | -    |
|                   | 3 | 0.109 **  | 0.140     | 0.440 ** | 0.328 | 0.551 | 0.015  | -0.010 | 0.043 | -    |
| <b>Females</b>    |   |           |           |          |       |       |        |        |       |      |
| Problem solving   | 1 | -0.186 ** | -0.905 ** | 0.492 ** | 0.425 | 0.559 | 0.168  | 0.140  | 0.200 | 15.8 |
|                   | 3 | -0.186 ** | -0.909 ** | 0.485 ** | 0.418 | 0.552 | 0.169  | 0.141  | 0.200 | 16.1 |
| Self-blame        | 1 | 0.187 **  | 1.357 **  | 0.492 ** | 0.425 | 0.559 | 0.254  | 0.213  | 0.298 | 23.9 |
|                   | 3 | 0.184 **  | 1.342 **  | 0.485 ** | 0.418 | 0.552 | 0.246  | 0.205  | 0.288 | 23.5 |
| Help seeking      | 1 | -0.170 ** | -0.585 ** | 0.492 ** | 0.425 | 0.559 | 0.100  | 0.080  | 0.121 | 9.4  |
|                   | 3 | -0.166 ** | -0.581 ** | 0.485 ** | 0.418 | 0.552 | 0.097  | 0.078  | 0.118 | 9.2  |
| Fantasy           | 1 | 0.063 **  | 0.088     | 0.492 ** | 0.425 | 0.559 | 0.006  | -0.002 | 0.014 | -    |
|                   | 3 | 0.069 **  | 0.104     | 0.485 ** | 0.418 | 0.552 | 0.007  | -0.001 | 0.016 | -    |
| Problem avoidance | 1 | 0.138 **  | 0.164 *   | 0.492 ** | 0.425 | 0.559 | 0.023  | 0.008  | 0.041 | 2.1  |
|                   | 3 | 0.140 **  | 0.152 *   | 0.485 ** | 0.418 | 0.552 | 0.021  | 0.006  | 0.039 | 2.0  |
| Rationalization   | 1 | 0.092 **  | 0.233 **  | 0.492 ** | 0.425 | 0.559 | 0.021  | 0.010  | 0.036 | 2.0  |
|                   | 3 | 0.095 **  | 0.237 **  | 0.485 ** | 0.418 | 0.552 | 0.023  | 0.011  | 0.038 | 2.1  |

\*  $p < 0.05$ , \*\*  $p < 0.001$ . a: Effect of CM on mediators, b: Effect of mediators on depressive symptoms. Model 1: Single factor analysis, Model 2: Adjusted for age, gender, urban/rural, school, only child status, parents' education level, economic status of family, Model 3: Adjusted for age, urban/rural, school, only child status, parents' education level, economic status of family.
